# Supplementary material for: An A–π–A′ structural ratiometric fluorescent probe based on benzo[e]indolium for bisulfite and its application in sugar samples and living cells
Source: Royal Society of Chemistry journal article supplement (doi:10.1039/c6ra15605c), 2016-01-01
Supplement: c6ra15605c1.pdf [file c6ra15605c1.pdf]

## Supplementary Material

### **An A- $\pi$ -A' structural ratiometric fluorescent probe based on benzo [e] indolium for bisulfite and its application in sugar samples and Living cells**

Yue Sun, Ying Li, Xiaotao Ma, Lian Duan\*

*School of Chemistry and Chemical Engineering, Taiyuan University of Technology,*

*Taiyuan 030024, China.*

## 1. Characterization of Probe 1.

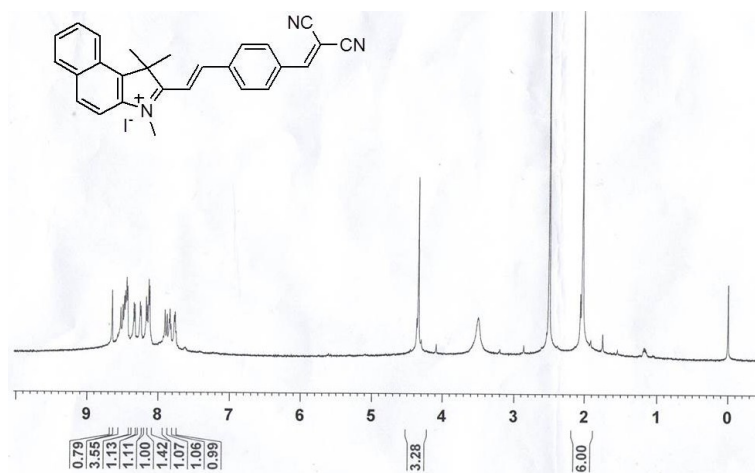

Fig. S1.  $^1\text{H}$  NMR spectrum of probe 1 in  $\text{DMSO}-d_6$ .

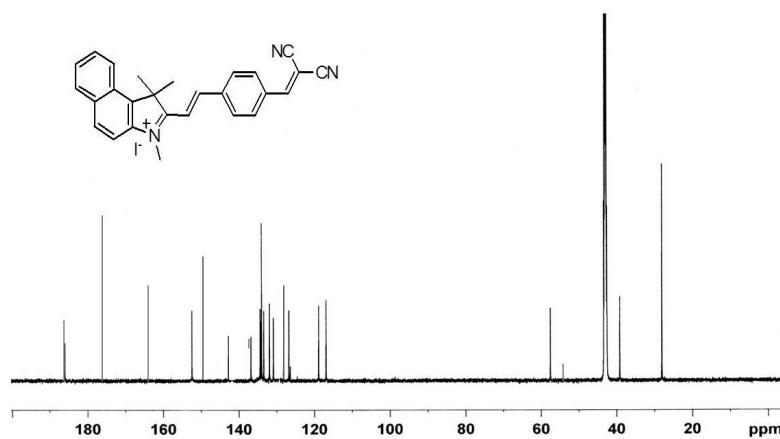

Fig. S2.  $^{13}\text{C}$  NMR spectrum of probe 1 in  $\text{DMSO}-d_6$ .

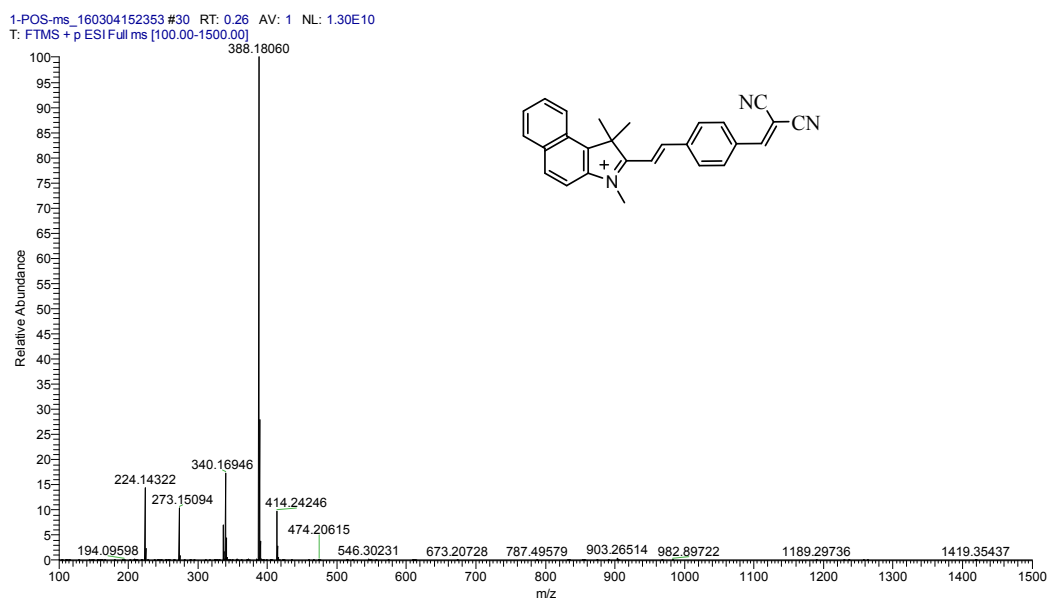

Fig. S3. ESIMS spectrum of probe 1.

## 2. pH effection.

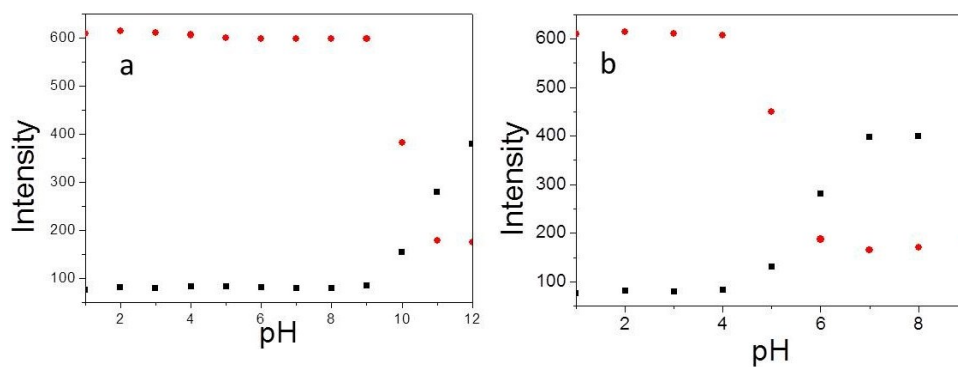

**Fig. S4.** Fluorescent intensity of probe **1** (10 μM) in the absence (a) and presence (b) of HSO<sub>3</sub><sup>-</sup> under various pH values. Black squares: emission intensity at 466 nm; and red dots: emission intensity at 578 nm.  $\lambda_{\text{ex}} = 400$  nm. Slits: 5 nm/ 5 nm.

## 3. Fluorescent ratio change.

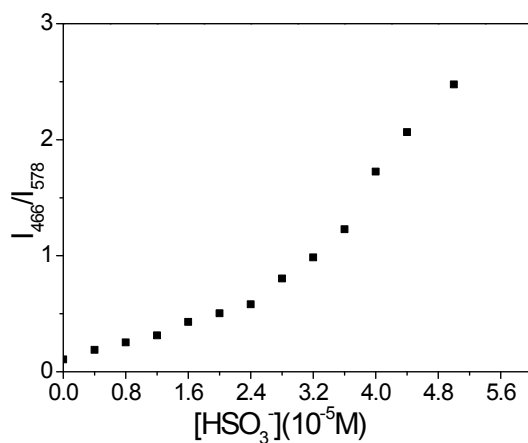

**Fig. S5.** Fluorescent intensity ratio ( $I_{466}/I_{578}$ ) in PBS buffer (pH 7.4, 10mM) as a function of HSO<sub>3</sub><sup>-</sup> concentration.  $\lambda_{\text{ex}} = 400$  nm. Slits: 5 nm/ 5 nm.

#### 4. Detection Limit.

The detection limit was calculated with the equation:  $\text{detection limit} = 3\sigma_{\text{bi}}/m$ , where  $\sigma_{\text{bi}}$  is the standard deviation of blank measurements,  $m$  is the slope between intensity versus sample concentration. To determine the S/N ratio, the emission intensity of **1** without  $\text{HSO}_3^-$  was measured by 10 times and the standard deviation of blank measurements was determined. The linear fitting formula was:  $Y = 0.01911X + 0.10643$ .

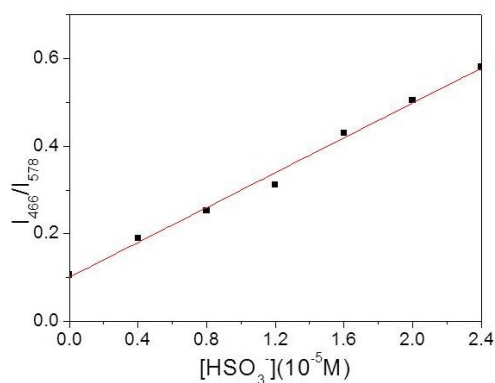

**Fig. S6.** The linear relation for concentration of  $\text{HSO}_3^-$  in the range of 0-24  $\mu\text{M}$ .

#### 5. Selectivity of probe **1**.

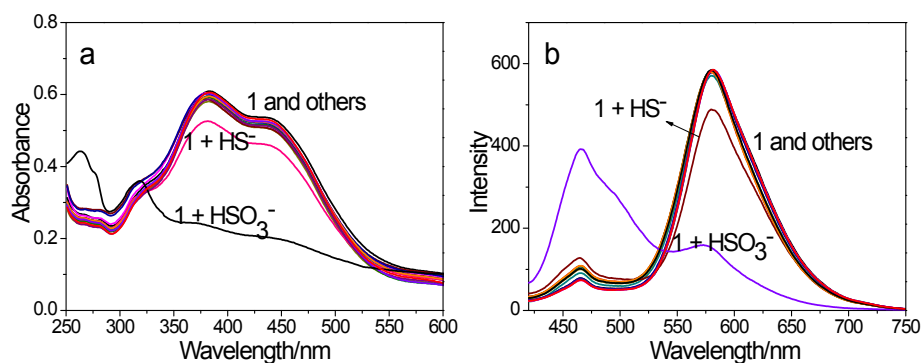

**Fig. S7.** Spectral of probe **1** treated with different analysts.

## 6. Fluorescent spectrum of probe 1 in competition experiment.

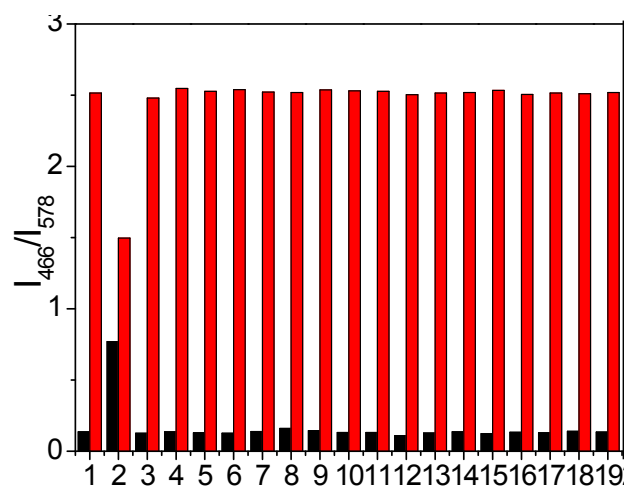

**Fig. S8.** Ratiometric changes of probe 1 (20  $\mu\text{M}$ ) in the presence of the competing species followed by HSO<sub>3</sub><sup>-</sup>. 1: probe 1 + HSO<sub>3</sub><sup>-</sup>; 2–19: HS<sup>-</sup>, F<sup>-</sup>, Cl<sup>-</sup>, Br<sup>-</sup>, I<sup>-</sup>, AcO<sup>-</sup>, ClO<sub>4</sub><sup>-</sup>, NO<sub>3</sub><sup>-</sup>, N<sub>3</sub><sup>-</sup>, SO<sub>4</sub><sup>2-</sup>, HSO<sub>4</sub><sup>-</sup>, SCN<sup>-</sup>, PO<sub>4</sub><sup>3-</sup>, HPO<sub>4</sub><sup>2-</sup>, H<sub>2</sub>PO<sub>4</sub><sup>-</sup>, Cys, Hcy and GSH (anions: 60  $\mu\text{M}$ ; Cys and Hcy: 200  $\mu\text{M}$ ; GSH: 10 mM).  $\lambda_{\text{ex}} = 400$  nm. Slits: 5 nm/ 5 nm.

## 7. ESIMS spectrum of the adduct.

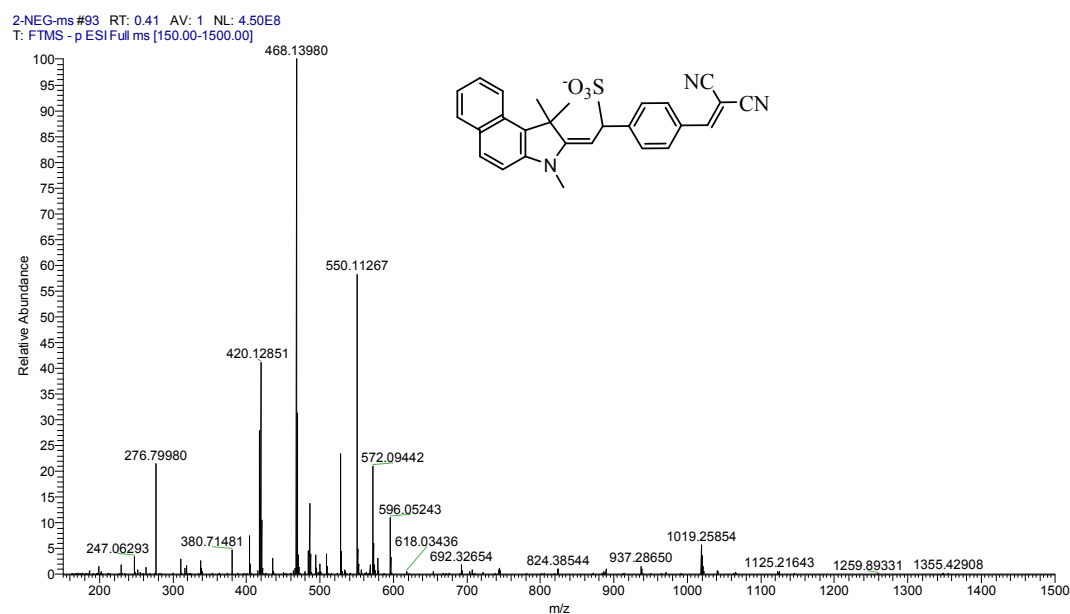

**Fig. S9.** ESIMS spectrum of [M-SO<sub>3</sub>]<sup>-</sup>. Calc.: 468.1387, found: 468.1398.

## 8. Paper test

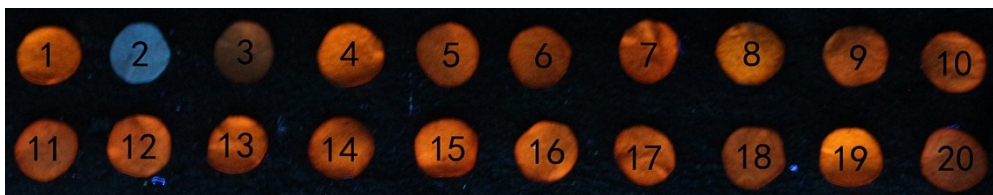

**Fig. S10.** Color changes of test paper with different species. 1: probe **1** alone; 2–20: probe **1** +  $\text{HSO}_3^-$ ,  $\text{HS}^-$ ,  $\text{F}^-$ ,  $\text{Cl}^-$ ,  $\text{Br}^-$ ,  $\text{I}^-$ ,  $\text{AcO}^-$ ,  $\text{ClO}_4^-$ ,  $\text{NO}_3^-$ ,  $\text{N}_3^-$ ,  $\text{SO}_4^{2-}$ ,  $\text{HSO}_4^-$ ,  $\text{SCN}^-$ ,  $\text{PO}_4^{3-}$ ,  $\text{HPO}_4^{2-}$ ,  $\text{H}_2\text{PO}_4^-$ , Cys, Hcy and GSH.

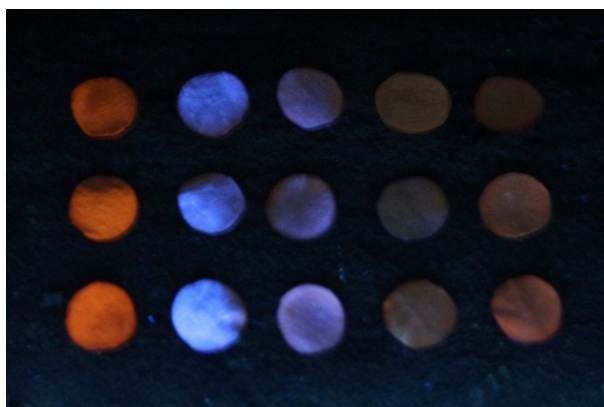

**Fig. S11.** Paper test for sugar samples. Top: Granulated sugar, middle: Soft sugar, and bottom: Crystal sugar. The order from left to right are: probe **1** only, concentration of sugar of 1g/10ml, 0.7g/10ml, 0.4g/10ml, and 0.1g/10ml.

## 9. MTT assay

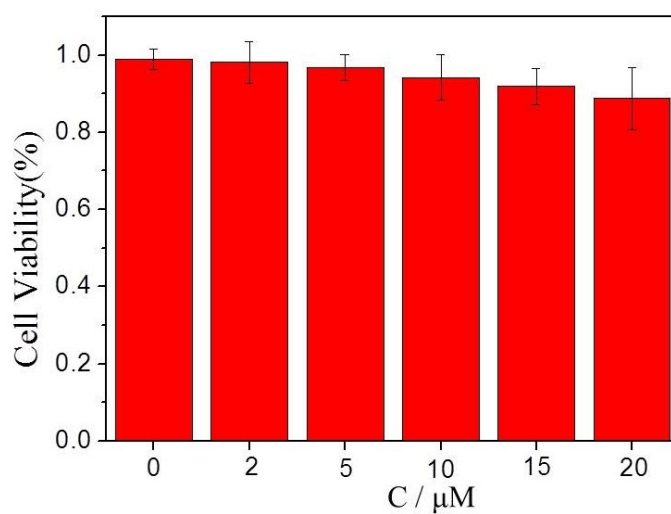

**Fig. S12.** Percentage of viable cells after treatment with various concentration of probe **1** after 12 hours.
